# Supplementary material for: Evaluation of a flow cytometry-based surrogate assay (FlowSA) for the detection of SARS-CoV-2 in clinical samples
Source: medRxiv preprint, doi:10.1101/2024.06.12.24308675, version 1 (2024-06-13)
Supplement: Supplementart Figure 3 [file 308675_file05.docx]

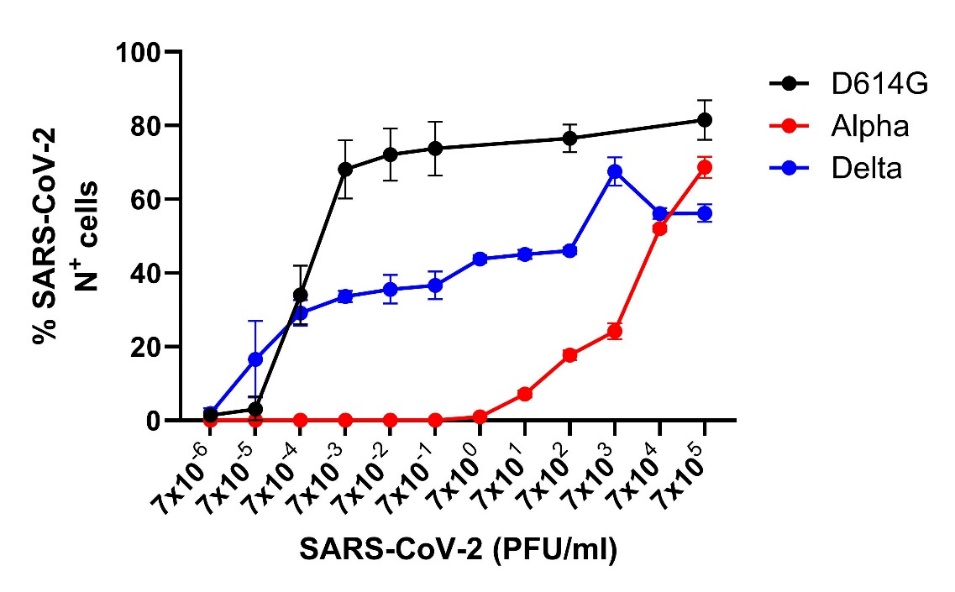


***Supplementary Figure 3:*** *Comparison of infectivity of various SARS-CoV-2 variants of concern –*D614G *strain, Alpha (B1.1.7), and Delta (B1.617.2)–using FlowSA. Data are presented as mean ± SEM of three independent experiments.*
